# Supplementary material for: Robust Hazmat Network Design Problems Considering Risk Uncertainty
Source: Atypon-hosted journal article supplement (doi:10.1287/trsc.2015.0645), 2015-12-21
Supplement: trsc.2015.0645-sm_appendix.pdf [file trsc.2015.0645-sm_appendix.pdf]

# Robust Hazmat Network Design Problems Considering Risk Uncertainty

Longsheng Sun, Mark H. Karwan, and Changyun Kwon\*

Department of Industrial and Systems Engineering  
University at Buffalo (SUNY), Buffalo, New York, USA

July 8, 2015

## Appendices

### A Proof of Projection Method

The procedure introduced in Section 5.2.3 obtains  $\bar{\mu}$  as the projection of  $\mu$  onto  $\{\mu : 0 \leq \mu_{ij} \leq 1 \forall (i, j) \in \mathcal{A}_k, \Gamma - \sum_{(i,j) \in \mathcal{A}_k} \mu_{ij} \geq 0\}$ .

*Proof.* The projection of  $\mu$  onto  $\{\mu : 0 \leq \mu_{ij} \leq 1 \forall (i, j) \in \mathcal{A}_k, \Gamma - \sum_{(i,j) \in \mathcal{A}_k} \mu_{ij} \geq 0\}$  can be formulated as:

$$\min \sum_{(i,j) \in \mathcal{A}_k} \frac{1}{2} (\mu_{ij} - \bar{\mu}_{ij})^2 \quad (1)$$

subject to

$$\begin{aligned} \sum_{(i,j) \in \mathcal{A}_k} \bar{\mu}_{ij} &\leq \Gamma && : \lambda \\ \bar{\mu}_{ij} &\leq 1 \quad \forall (i, j) \in \mathcal{A}_k && : v_{ij} \\ \bar{\mu}_{ij} &\geq 0 \quad \forall (i, j) \in \mathcal{A}_k && : \rho_{ij} \end{aligned}$$

---

\*Corresponding Author: [chkwon@buffalo.edu](mailto:chkwon@buffalo.edu), +1-716-645-4705

The Karush-Kuhn-Tucker (KKT) conditions for problem (1) are

$$\bar{\mu}_{ij} - \mu_{ij} + \lambda + v_{ij} - \rho_{ij} = 0 \quad (2)$$

$$\lambda \left( \sum_{(i,j) \in \mathcal{A}_k} \bar{\mu}_{ij} - \Gamma \right) = 0 \quad (3)$$

$$v_{ij}(\bar{\mu}_{ij} - 1) = 0 \quad (4)$$

$$\rho_{ij}\bar{\mu}_{ij} = 0 \quad (5)$$

$$\lambda, v_{ij}, \rho_{ij} \geq 0 \quad (6)$$

$$\sum_{(i,j) \in \mathcal{A}_k} \bar{\mu}_{ij} \leq \Gamma \quad (7)$$

$$\bar{\mu}_{ij} \leq 1 \quad (8)$$

$$\bar{\mu}_{ij} \geq 0 \quad (9)$$

Problem (1) is strictly convex over a nonempty bounded region, so there must exist multipliers  $\lambda$ ,  $v_{ij}$  and  $\rho_{ij}$  that satisfy the KKT conditions. We show that we can find a solution to the above KKT conditions by following the projection procedure in Section 5.2.3.

1. For any  $\lambda$ , we set

$$\bar{\mu}_{ij} = \max\{0, \min\{1, \mu_{ij} - \lambda\}\} \quad (10)$$

$$v_{ij} = \max\{0, \mu_{ij} - \lambda - 1\}$$

$$\rho_{ij} = \max\{0, -(\mu_{ij} - \lambda)\}$$

for each  $(i, j) \in \mathcal{A}_k$ . We consider the following three cases:

- When  $\mu_{ij} - \lambda \geq 1$ , we have  $\bar{\mu}_{ij} = 1$ ,  $\rho_{ij} = 0$ , and  $v_{ij} = \mu_{ij} - \lambda - 1$ .
- When  $0 \leq \mu_{ij} - \lambda < 1$ , we have  $\bar{\mu}_{ij} = \mu_{ij} - \lambda$ ,  $\rho_{ij} = 0$ , and  $v_{ij} = 0$ .
- When  $\mu_{ij} - \lambda < 0$ , we have  $\bar{\mu}_{ij} = 0$ ,  $\rho_{ij} = -(\mu_{ij} - \lambda)$ , and  $v_{ij} = 0$ .

The above  $\bar{\mu}_{ij}$ ,  $\rho_{ij}$ , and  $v_{ij}$  satisfy conditions (2), (4), (5), (6), (8), and (9) for any given  $\lambda$ . Remaining conditions are (3), (7), and the nonnegativity of  $\lambda$ .

2. When  $\lambda = 0$ , if the resulting  $\bar{\mu}_{ij} = \max\{0, \min\{1, \mu_{ij}\}\}$  satisfies (7), then we are done as described in Step 0 of the projection procedure. If not, we can show that we can obtain  $\lambda > 0$  such that (3) and (7) hold, by following Step 1 of the projection procedure. That is, we can find  $\lambda > 0$  such

that

$$\sum_{(i,j) \in \mathcal{A}_k} \bar{\mu}_{ij} = \sum_{(i,j) \in \mathcal{A}_k} \max\{0, \min\{1, \mu_{ij} - \lambda\}\} = \Gamma. \quad (11)$$

Equation (11) can be rewritten as

$$\sum_{(i,j) \in \mathcal{A}_k} \bar{\mu}_{ij} = \sum_{\{(i,j) \in \mathcal{A}_k : \mu_{ij} - 1 \leq \lambda < \mu_{ij}\}} (\mu_{ij} - \lambda) + \sum_{\{(i,j) \in \mathcal{A}_k : \lambda < \mu_{ij} - 1\}} (1) + \sum_{\{(i,j) \in \mathcal{A}_k : \lambda \geq \mu_{ij}\}} (0) = \Gamma. \quad (12)$$

In equation (12),  $\mu_{ij}$  and  $\mu_{ij} - 1$  are critical values. Thus we can find the value of  $\lambda$  by searching the interval of these values as used in Step 1.

This completes the proof. □
